# Supplementary material
Source: ML conference proceedings conference paper supplement (https://aclanthology.org/D19-1228)
Supplement: Attachment [file Verb_projectivity_write_up (24).pdf › Verb_projectivity_write_up (24).pdf]

# Supplementary Material: How well do NLI models capture verb veridicality?

**Alexis Ross**

Harvard University

alexis\_ross@college.harvard.edu

**Ellie Pavlick**

Brown University

ellie\_pavlick@brown.edu

## A Does MNLI contain enough signal?

The fact that the BERT-based model’s prediction performance is poor may be due to the fact that it has not been given sufficient training examples to be able to learn about the particular projection patterns associated with verbs. E.g. it might be representing the information needed to inform their signature, but not given enough training examples such that it knows to/how to use it.

To investigate this, we first count the raw number of times that the lemmatized verb followed by the appropriate particle appear in MNLI train (e.g. how many times does “*know that*” or “*go to*” appear in the premise or hypothesis). Then, we look for particular constructions of interest—i.e. 1) the verb lemma appears in the premise; 2) it appears as a verb (according to the parser); and 3) it appears as the root of a subtree that begins with the verb-particle construction. Table 2 gives the full counts for how often each verb appears at all and within a relevant construction within MNLI.

It is worth noting that all 137 verbs in our dataset appear at least once in MNLI train. The mean number of occurrences is 412 ( $\sigma=1,047$ ). “*have to*” occurs the most often (7,459 times); “*advise that*” occurs the least often (1 time). Nearly all<sup>1</sup> verbs also occur in the setting that we care about (i.e. as the root of a verb phrase in the premise). On average, each verb occurs 212 times ( $\sigma = 564$ ) in the desired setting, or 56% ( $\mu = 0.56, \sigma = 0.25$ ) of the times it occurs.

Second, we perform a small annotation ourselves on the cases when the verb appears in the desired setting, to assess whether the inferences made do in fact require reasoning about the projection signature of the verb. Specifically, we take a sample of 100 *p/h* pairs, sampled uniformly

<sup>1</sup>Except for “*advise that*”, which appears as the root of a verb phrase in the hypothesis

across verb types, and have one of the authors judge whether or not each inference depends on the verbs projective behavior. We consider the inference to “depend on” the projective behavior if the truth of the complement clause in the premise is relevant to the hypothesis. Table 1 gives examples from MNLI train in which this is and is not the case.

In our sample of 100, we find that 21 of the inferences do in fact require making some assumption about projectivity.<sup>2</sup> We marked 18 examples as “not applicable” since the verb did not actually appear in the construction we wanted it to (i.e. due to faulty parses, mostly from the telephone domain). In the remaining 61 examples, the verb construction was present but not related to the inference for which the model was being trained.

Thus, a very back-of-the-envelope computation would suggest that, on average, 21% of the on average 212 relevant occurrences of each verb type—i.e. around 40 *p/h* pairs per verb type—could be useful training examples for the phenomenon we study here. Our analysis suggests that this amount of training is sufficient for the model to learn non-trivial aspects of projective behavior of these verbs, but not to “master” such inferences. Future work will be required to determine what the minimum number/proportion of examples is that is needed for currently models to learn the correct behavior. How many examples should be required is a normative question.

## B Annotation Guidelines

We are researchers from the Institution, trying to help computers understand language! Understanding language allows computers to do use-

<sup>2</sup>Note this does not necessarily mean that the judgment which yields the correct label is consistent with formal semantic analysis of the verb’s signature, and in fact it often is not.

|                                                                                                                                                          |
|----------------------------------------------------------------------------------------------------------------------------------------------------------|
| Requires reasoning about veridicality                                                                                                                    |
| p: Orrin Hatch has to acknowledge that Lee is well qualified for the post he seeks.<br>h: Lee is completely unqualified for the post.                    |
| p: Rubin agnostics will be glad to learn that there are two weak spots in his record.<br>h: Rubin has a very strong record                               |
| Does not require reasoning about veridicality                                                                                                            |
| p : But after being forewarned, if it happens again, I'll be hard to convince that you were in the right.<br>h: I won't believe you if it happens again. |
| p: Finally, CBO did not attempt to price the relocation of personnel to a central location.<br>h: CBO didn't want to relocate any of their personnel.    |

Table 1: Examples of MNLI train examples that do (top two) and do not (bottom two) require reasoning about veridicality.

ful things like answer our questions or summarize news articles for us. While common sense reasoning is easy for people, it is very very hard for computers. Please help us by using your common sense to decide if sentences are more likely to be true or false.

Note: Many of these sentences have been automatically generated and some many be difficult to interpret. Please select the "does not make sense" option if you feel you cannot make any reasonable inference of what the sentence is supposed to mean. You will never be punished for choosing this option.

**Instructions.** For each pair of sentences, assume that the first sentence is true, describes a real scenario, or expresses an opinion. Using your best judgement, indicate how likely it is, on a scale of 1 to 5, that the second sentence is also true, describes the same scenario, or expresses the same opinion.

**1. Your answers should be based only on information which is stated or implied by the first sentence.** Even if the second sentence seems like it is reasonably true in general, you should only choose 4 or 5 if the truth of the second sentence can be inferred entirely from the first sentence. E.g. for the sentence pair below, you should choose 3 since the first sentence alone provides us no way of knowing that Greece is in Europe (even though our world knowledge tells us that the second sentence is true).

**Example 1**

Greece is a country.  
Greece is a European country.

CORRECT ANSWER: 3, not necessarily true or necessarily false.

**2. The order of the sentences is important.**

For example, when the same sentences as above are provided in the opposite order, the correct answer changes to 5: definitely true.

**Example 2**

Greece is a European country.  
Greece is a country.  
CORRECT ANSWER: 5, definitely true.

**3. It is okay to make reasonable assumptions.**

If the first sentence makes it highly unlikely that the second is true, indicate so by choosing option 1 or 2. Try to interpret the sentences as you would if you heard them in a real life conversation. It is okay to make reasonable assumptions that you believe most people would make. E.g. it is okay to assume that a bomb is not a fake bomb in the below context.

**Example 3**

The terrorists were collecting materials to build a bomb.  
The terrorists were collecting materials to build a fake bomb.  
CORRECT ANSWER: 1, definitely NOT true. or 2, probably NOT true.

**Example 4**

The man failed to submit the report on time  
The man submitted the report on time  
CORRECT ANSWER: 1, definitely NOT true. or 2, probably NOT true.

**4. When in doubt, you should err on the side of uncertainty.** If the context of the first sen-

tence makes it reasonably possible for the second to be either true or false, choose 3.

**Example 5**

Secretary Clinton is the expected nominee.

Secretary Clinton is the nominee.

CORRECT ANSWER: 3, not necessarily true or necessarily false.

**Example 6**

The police have arrested a suspected murderer.

The police have arrested a murderer.

CORRECT ANSWER: 3, not necessarily true or necessarily false.

**5. Take the entire sentence into account.**

Remember that we are interested in the information communicated by the sentence as a whole. Inserting the same words might lead to different answers in different contexts.

**Example 7** She is a potential candidate for the Senate.

She is a candidate for the Senate.

CORRECT ANSWER: 3, not necessarily true or necessarily false.

**Example 8**

They are talking about potential candidates for the Senate.

They are talking about candidates for the Senate.

CORRECT ANSWER: 4, probably true or 5, definitely true.

Keep in mind, we are predominantly interested in understanding whether the second sentence communicates the same information as the first, or if it adds or removes important information.

## C Verbs Excluded by Annotation Filters

See Table 4 for number of contexts excluded per verb type.

To measure inter-rater agreement, for each example and each of the three raters assigned to the example, we calculated the correlation between that rater's score and the averaged score of the other two raters. The Spearman correlation among raters, averaged across the three raters for each example, was 0.78 for positive contexts and 0.74 for negative contexts.

## D Counterfactual Results by Verb

See below tables (Table 5) for KL divergence between baseline and target distributions that result from substitutions involving each verb type.

|                 |      |      |                |      |      |                  |      |      |
|-----------------|------|------|----------------|------|------|------------------|------|------|
| have to         | 7444 | 0.64 | want to        | 6947 | 0.48 | need to          | 5294 | 0.31 |
| like to         | 2808 | 0.48 | think that     | 2702 | 0.61 | know that        | 2093 | 0.73 |
| try to          | 1897 | 0.61 | come to        | 1652 | 0.45 | say that         | 1451 | 0.44 |
| get to          | 1229 | 0.49 | believe that   | 1156 | 0.59 | seem to          | 1065 | 0.78 |
| tend to         | 915  | 0.61 | plan to        | 838  | 0.13 | ensure that      | 672  | 0.92 |
| continue to     | 626  | 0.71 | see that       | 621  | 0.69 | show that        | 613  | 0.20 |
| attempt to      | 612  | 0.14 | mean that      | 571  | 0.36 | love to          | 509  | 0.43 |
| feel that       | 502  | 0.55 | state that     | 464  | 0.03 | find that        | 447  | 0.72 |
| return to       | 375  | 0.32 | claim that     | 363  | 0.20 | work to          | 347  | 0.22 |
| wish to         | 331  | 0.53 | report that    | 328  | 0.06 | agree that       | 307  | 0.57 |
| prefer to       | 304  | 0.46 | note that      | 301  | 0.36 | refuse to        | 299  | 0.15 |
| begin to        | 292  | 0.59 | happen to      | 287  | 0.70 | help to          | 284  | 0.30 |
| mean to         | 277  | 0.38 | suggest that   | 272  | 0.83 | felt that        | 269  | 0.52 |
| hope that       | 269  | 0.43 | choose to      | 263  | 0.60 | be that          | 259  | 0.83 |
| understand that | 251  | 0.79 | saw that       | 238  | 0.66 | realize that     | 233  | 0.77 |
| claim to        | 230  | 0.17 | argue that     | 219  | 0.75 | use to           | 219  | 0.51 |
| seek to         | 209  | 0.37 | appear to      | 207  | 0.78 | assume that      | 206  | 0.73 |
| hope to         | 206  | 0.47 | start to       | 189  | 0.44 | remember that    | 185  | 0.78 |
| move to         | 181  | 0.36 | fail to        | 177  | 0.69 | expect to        | 175  | 0.63 |
| decide to       | 163  | 0.63 | turn to        | 152  | 0.53 | estimate that    | 139  | 0.22 |
| doubt that      | 135  | 0.11 | intend to      | 124  | 0.60 | indicate that    | 117  | 0.87 |
| hear that       | 116  | 0.62 | wish that      | 113  | 0.32 | say to           | 112  | 0.54 |
| admit that      | 111  | 0.76 | recognize that | 108  | 0.86 | notice that      | 105  | 0.71 |
| learn to        | 102  | 0.74 | manage to      | 100  | 0.72 | struggle to      | 95   | 0.03 |
| aim to          | 93   | 0.16 | conclude that  | 88   | 0.78 | wait to          | 87   | 0.41 |
| prove that      | 86   | 0.49 | concern that   | 83   | 0.00 | agree to         | 74   | 0.65 |
| promise to      | 73   | 0.25 | require that   | 71   | 0.76 | fear that        | 69   | 0.39 |
| worry that      | 64   | 0.47 | demand that    | 62   | 0.19 | expect that      | 59   | 0.71 |
| suspect that    | 56   | 0.64 | pretend to     | 55   | 0.44 | learn that       | 54   | 0.72 |
| forget to       | 52   | 0.63 | deserve to     | 51   | 0.29 | request that     | 50   | 0.48 |
| hold that       | 49   | 0.18 | decline to     | 48   | 0.31 | prove to         | 48   | 0.50 |
| mention that    | 45   | 0.47 | tell that      | 43   | 0.21 | demonstrate that | 41   | 0.88 |
| give that       | 40   | 0.60 | imply that     | 40   | 0.90 | comment that     | 39   | 0.00 |
| insist that     | 39   | 0.77 | strive to      | 38   | 0.63 | confirm that     | 37   | 0.49 |
| explain that    | 37   | 0.81 | discover that  | 33   | 0.73 | serve to         | 33   | 0.73 |
| recommend that  | 28   | 0.86 | ask to         | 27   | 0.67 | seem that        | 27   | 0.78 |
| dare to         | 26   | 0.46 | proceed to     | 24   | 1.12 | add that         | 23   | 0.39 |
| complain that   | 23   | 0.52 | propose to     | 23   | 0.91 | reveal that      | 23   | 0.78 |
| determine that  | 22   | 0.82 | predict that   | 21   | 0.71 | contend that     | 20   | 0.75 |
| observe that    | 20   | 0.90 | reply that     | 19   | 0.63 | assert that      | 17   | 0.88 |
| cease to        | 17   | 0.18 | provide that   | 17   | 1.06 | remain to        | 16   | 0.94 |
| declare that    | 14   | 0.43 | threaten to    | 14   | 0.64 | write that       | 14   | 0.86 |
| decide that     | 13   | 0.46 | exist to       | 13   | 0.69 | acknowledge that | 12   | 0.50 |
| announce that   | 11   | 0.82 | appear that    | 10   | 0.60 | prepare to       | 10   | 0.90 |
| propose that    | 8    | 0.75 | speculate that | 8    | 1.50 | convince that    | 3    | 1.00 |
| warn that       | 3    | 1.00 | advise that    | 1    | 0.00 |                  |      |      |

Table 2: For each verb construction: 1) how many times did it appear at all in MNLI? and 2) in what percentage did it appear in a format like that we test for, i.e. as the root of a verb phrase involving the relevant complement type?

|     | Correlation |      | Overlap |      |
|-----|-------------|------|---------|------|
|     | Pos.        | Neg. | Pos.    | Neg. |
| +/+ | 0.52        | 0.7  | 0.17    | 0.11 |
| +/- | 0.55        | 0.69 | 0.16    | 0.15 |
| -/+ | 0.47        | 0.61 | 0.18    | 0.12 |
| o/+ | 0.81        | 0.67 | 0.15    | 0.12 |
| o/- | 0.72        | 0.54 | 0.14    | 0.11 |
| -/o | 0.49        | 0.53 | 0.13    | 0.11 |
| +/o | 0.46        | 0.64 | 0.15    | 0.13 |
| o/o | 0.73        | 0.66 | 0.15    | 0.13 |

Table 3: Inter-rater reliability by verb signature. For each signature, the following metrics were calculated: 1) correlation (Spearman), 2) absolute overlap. Correlation was calculated between the score of each rater (3 per example) and the averaged scores of the other two raters. Absolute overlap was calculated for each pair of raters. These metrics were averaged across examples and raters.

**Excluded:** allow to (0/12), ask that (0/12), take to (0/12), suppose to (0/12), require to (0/12), relate to (0/10), refer to (0/12), leave to (0/12), lead to (0/12), know to (0/12), fund to (0/10), force to (0/12), do to (0/12), determine to (0/12), design to (0/12), consider to (0/12), believe to (0/12), think to (0/12). **Rest:** attempt to (28/40), manage to (30/40), know that (32/40), recommend that (4/12), demand that (4/12), require that (4/12), come to (5/12), request that (5/12), forget to (15/22), get to (6/12), ask to (6/12), hope to (18/24), realize that (34/40), try to (34/40), prepare to (6/12), pretend to (6/12), wait to (6/12), give that (7/12), dare to (8/13), return to (6/11), threaten to (7/12), exist to (7/12), remain to (7/12), be that (7/12), use to (7/12), deserve to (7/12), report that (8/12), hope that (20/24), hold that (8/12), happen to (8/12), refuse to (36/40), move to (8/12), need to (8/12), prefer to (8/12), expect to (8/12), discover that (8/12), propose that (8/12), tend to (8/12), turn to (8/12), claim to (8/12), work to (8/12), declare that (8/12), wish that (8/12), announce that (9/12), ensure that (9/12), claim that (9/12), propose to (9/12), help to (9/12), say to (9/12), advise that (8/11), wish to (9/12), have to (9/12), struggle to (9/12), choose to (10/12), add that (10/12), cease to (10/12), demonstrate that (10/12), learn to (10/12), understand that (10/12), appear to (10/12), mean to (10/12), want to (10/12), agree to (10/12), hear that (9/11), seem to (10/12), provide that (10/12), predict that (10/12), recognize that (10/12), contend that (10/12), strive to (10/12), feel that (10/12), fear that (10/12), fail to (10/12), explain that (10/12), seek to (10/12), doubt that (10/12), prove that (10/12), note that (10/12), prove to (11/12), think that (11/12), remember that (17/18), tell that (11/12), suspect that (11/12), start to (11/12), saw that (11/12), serve to (11/12), see that (11/12), seem that (11/12), acknowledge that (11/12), learn that (11/12), promise to (11/12), felt that (11/12), admit that (11/12), aim to (11/12), appear that (11/12), argue that (11/12), assert that (11/12), assume that (11/12), believe that (11/12), concern that (11/12), confirm that (11/12), convince that (11/12), decide that (11/12), decide to (11/12), estimate that (11/12), write that (11/12), insist that (11/12), plan to (11/12), intend to (11/12), observe that (11/12), imply that (11/12), indicate that (11/12), mention that (14/15), say that (12/12), begin to (12/12), love to (12/12), mean that (12/12), notice that (12/12), comment that (10/10), warn that (12/12), agree that (12/12), worry that (12/12), like to (12/12), conclude that (12/12), complain that (12/12), reply that (12/12), find that (12/12), suggest that (12/12), continue to (12/12), state that (12/12), speculate that (12/12), proceed to (10/10), decline to (12/12), determine that (12/12), reveal that (12/12), expect that (12/12), show that (12/12)

Table 4: The effects of our exclusion criteria by verb. Parentheses denote the number of contexts included post exclusion out of the total number of contexts we obtained Turk annotations for.

|                           |                 | Main Verb |      | Compl. Verb |      |
|---------------------------|-----------------|-----------|------|-------------|------|
|                           |                 | Pos.      | Neg. | Pos.        | Neg. |
| admit that<br>(+/+)       | $D^*    D_{vt}$ | 0.03      | 0.29 | 0.13        | 1.57 |
|                           | $D^*    D$      | 0.02      | 0.10 | 0.00        | 0.06 |
| notice that<br>(+/+)      | $D^*    D_{vt}$ | 0.01      | 0.03 | 0.12        | 0.22 |
|                           | $D^*    D$      | 0.03      | 0.37 | 0.00        | 0.04 |
| observe that<br>(+/+)     | $D^*    D_{vt}$ | 0.01      | 0.36 | 0.08        | 1.28 |
|                           | $D^*    D$      | 0.03      | 0.13 | 0.00        | 0.07 |
| reveal that<br>(+/+)      | $D^*    D_{vt}$ | 0.03      | 0.22 | 0.17        | 1.92 |
|                           | $D^*    D$      | 0.03      | 0.13 | 0.00        | 0.06 |
| see that<br>(+/+)         | $D^*    D_{vt}$ | 0.02      | 0.14 | 0.11        | 0.02 |
|                           | $D^*    D$      | 0.02      | 0.00 | 0.00        | 0.05 |
| remember that<br>(+/+)    | $D^*    D_{vt}$ | 0.03      | 0.65 | 0.15        | 1.31 |
|                           | $D^*    D$      | 0.02      | 0.06 | 0.00        | 0.04 |
| learn that<br>(+/+)       | $D^*    D_{vt}$ | 0.01      | 0.79 | 0.15        | 2.05 |
|                           | $D^*    D$      | 0.03      | 0.30 | 0.00        | 0.05 |
| understand that<br>(+/+)  | $D^*    D_{vt}$ | 0.02      | 0.03 | 0.14        | 1.84 |
|                           | $D^*    D$      | 0.03      | 0.42 | 0.01        | 0.03 |
| find that<br>(+/+)        | $D^*    D_{vt}$ | 0.03      | 1.46 | 0.16        | 3.10 |
|                           | $D^*    D$      | 0.02      | 0.12 | 0.00        | 0.04 |
| note that<br>(+/+)        | $D^*    D_{vt}$ | 0.01      | 0.36 | 0.06        | 1.20 |
|                           | $D^*    D$      | 0.03      | 0.12 | 0.01        | 0.10 |
| know that<br>(+/+)        | $D^*    D_{vt}$ | 0.03      | 0.13 | 0.20        | 1.77 |
|                           | $D^*    D$      | 0.02      | 0.24 | 0.00        | 0.02 |
| recognize that<br>(+/+)   | $D^*    D_{vt}$ | 0.02      | 0.15 | 0.13        | 1.53 |
|                           | $D^*    D$      | 0.03      | 0.26 | 0.00        | 0.06 |
| realize that<br>(+/+)     | $D^*    D_{vt}$ | 0.03      | 0.07 | 0.20        | 1.98 |
|                           | $D^*    D$      | 0.03      | 0.42 | 0.00        | 0.03 |
| acknowledge that<br>(+/+) | $D^*    D_{vt}$ | 0.05      | 0.06 | 0.04        | 0.20 |
|                           | $D^*    D$      | 0.02      | 0.12 | 0.00        | 0.06 |
| discover that<br>(+/+)    | $D^*    D_{vt}$ | 0.09      | 0.44 | 0.05        | 1.64 |
|                           | $D^*    D$      | 0.02      | 0.07 | 0.00        | 0.06 |
| start to<br>(+/-)         | $D^*    D_{vt}$ | 0.00      | 0.42 | 0.60        | 0.86 |
|                           | $D^*    D$      | 0.16      | 0.05 | 0.00        | 0.00 |
| get to<br>(+/-)           | $D^*    D_{vt}$ | 0.00      | 0.19 | 0.66        | 0.91 |
|                           | $D^*    D$      | 0.16      | 0.09 | 0.00        | 0.00 |
| manage to<br>(+/-)        | $D^*    D_{vt}$ | 0.00      | 0.05 | 0.80        | 0.03 |
|                           | $D^*    D$      | 0.16      | 0.10 | 0.00        | 0.00 |
| begin to<br>(+/-)         | $D^*    D_{vt}$ | 0.00      | 0.01 | 0.60        | 0.08 |
|                           | $D^*    D$      | 0.16      | 0.03 | 0.00        | 0.00 |
| use to<br>(+/-)           | $D^*    D_{vt}$ | 0.01      | 0.40 | 0.50        | 0.96 |
|                           | $D^*    D$      | 0.12      | 0.04 | 0.00        | 0.00 |
| come to<br>(+/-)          | $D^*    D_{vt}$ | 0.00      | 0.13 | 0.52        | 0.99 |
|                           | $D^*    D$      | 0.16      | 0.12 | 0.00        | 0.00 |
| dare to<br>(+/-)          | $D^*    D_{vt}$ | 0.07      | 1.00 | 0.49        | 0.68 |
|                           | $D^*    D$      | 0.08      | 0.07 | 0.00        | 0.00 |
| serve to<br>(+/-)         | $D^*    D_{vt}$ | 0.00      | 0.27 | 0.56        | 1.12 |
|                           | $D^*    D$      | 0.16      | 0.08 | 0.00        | 0.00 |
| learn to<br>(+/-)         | $D^*    D_{vt}$ | 0.00      | 0.20 | 0.69        | 0.34 |
|                           | $D^*    D$      | 0.16      | 0.01 | 0.00        | 0.01 |
| fail to<br>(-/+)          | $D^*    D_{vt}$ | 0.00      | 0.01 | 1.67        | 1.36 |
|                           | $D^*    D$      | 1.37      | 1.21 | 0.01        | 0.00 |
| forget to<br>(-/+)        | $D^*    D_{vt}$ | 0.06      | 0.11 | 1.08        | 5.46 |
|                           | $D^*    D$      | 0.92      | 1.36 | 0.01        | 0.01 |
| mean to<br>(o/+)          | $D^*    D_{vt}$ | 0.03      | 1.04 | 0.45        | 1.05 |
|                           | $D^*    D$      | 0.15      | 0.00 | 0.00        | 0.00 |
| predict that<br>(o/+)     | $D^*    D_{vt}$ | 0.00      | 3.00 | 0.05        | 3.59 |
|                           | $D^*    D$      | 0.01      | 0.04 | 0.00        | 0.08 |
| explain that<br>(o/+)     | $D^*    D_{vt}$ | 0.01      | 0.06 | 0.12        | 1.43 |
|                           | $D^*    D$      | 0.03      | 0.31 | 0.00        | 0.07 |
| add that<br>(o/+)         | $D^*    D_{vt}$ | 0.01      | 0.03 | 0.09        | 1.16 |
|                           | $D^*    D$      | 0.03      | 0.38 | 0.00        | 0.07 |
| warn that<br>(o/+)        | $D^*    D_{vt}$ | 0.07      | 0.08 | 0.10        | 1.15 |
|                           | $D^*    D$      | 0.01      | 0.22 | 0.00        | 0.08 |
| suspect that<br>(o/+)     | $D^*    D_{vt}$ | 0.71      | 0.04 | 0.07        | 0.19 |
|                           | $D^*    D$      | 0.10      | 0.09 | 0.01        | 0.03 |

|                           |                 | Main Verb |      | Compl. Verb |      |
|---------------------------|-----------------|-----------|------|-------------|------|
|                           |                 | Pos.      | Neg. | Pos.        | Neg. |
| attempt to<br>(o/-)       | $D^*    D_{vt}$ | 0.25      | 0.07 | 0.68        | 0.01 |
|                           | $D^*    D$      | 0.07      | 0.09 | 0.00        | 0.00 |
| decline to<br>(-/-)       | $D^*    D_{vt}$ | 0.54      | 0.03 | 6.26        | 0.33 |
|                           | $D^*    D$      | 1.32      | 0.55 | 0.03        | 0.01 |
| refuse to<br>(-/-)        | $D^*    D_{vt}$ | 0.38      | 0.03 | 7.57        | 1.44 |
|                           | $D^*    D$      | 1.52      | 0.96 | 0.05        | 0.01 |
| remain to<br>(-/-)        | $D^*    D_{vt}$ | 0.50      | 0.01 | 0.16        | 0.06 |
|                           | $D^*    D$      | 0.12      | 0.05 | 0.00        | 0.01 |
| help to<br>(+/-)          | $D^*    D_{vt}$ | 0.01      | 1.46 | 0.60        | 0.83 |
|                           | $D^*    D$      | 0.12      | 0.02 | 0.00        | 0.00 |
| have to<br>(+/-)          | $D^*    D_{vt}$ | 0.01      | 0.19 | 0.66        | 1.26 |
|                           | $D^*    D$      | 0.14      | 0.10 | 0.00        | 0.01 |
| tend to<br>(+/-)          | $D^*    D_{vt}$ | 0.00      | 0.20 | 0.54        | 0.90 |
|                           | $D^*    D$      | 0.16      | 0.10 | 0.00        | 0.00 |
| confirm that<br>(+/-)     | $D^*    D_{vt}$ | 0.05      | 0.17 | 0.05        | 2.05 |
|                           | $D^*    D$      | 0.02      | 0.16 | 0.00        | 0.07 |
| demonstrate that<br>(+/-) | $D^*    D_{vt}$ | 0.04      | 0.04 | 0.10        | 0.05 |
|                           | $D^*    D$      | 0.02      | 0.05 | 0.00        | 0.03 |
| show that<br>(+/-)        | $D^*    D_{vt}$ | 0.03      | 0.35 | 0.11        | 0.90 |
|                           | $D^*    D$      | 0.02      | 0.05 | 0.00        | 0.04 |
| determine that<br>(+/-)   | $D^*    D_{vt}$ | 0.05      | 0.87 | 0.09        | 2.67 |
|                           | $D^*    D$      | 0.01      | 0.11 | 0.01        | 0.07 |
| ensure that<br>(+/-)      | $D^*    D_{vt}$ | 0.05      | 0.44 | 0.06        | 0.87 |
|                           | $D^*    D$      | 0.01      | 0.01 | 0.01        | 0.08 |
| move to<br>(o/o)          | $D^*    D_{vt}$ | 0.01      | 0.10 | 0.54        | 0.12 |
|                           | $D^*    D$      | 0.13      | 0.02 | 0.00        | 0.00 |
| intend to<br>(o/o)        | $D^*    D_{vt}$ | 0.01      | 0.34 | 0.55        | 0.95 |
|                           | $D^*    D$      | 0.15      | 0.06 | 0.00        | 0.00 |
| seek to<br>(o/o)          | $D^*    D_{vt}$ | 0.35      | 0.16 | 0.51        | 0.99 |
|                           | $D^*    D$      | 0.06      | 0.12 | 0.00        | 0.00 |
| agree to<br>(o/o)         | $D^*    D_{vt}$ | 0.01      | 0.00 | 0.63        | 0.00 |
|                           | $D^*    D$      | 0.14      | 0.00 | 0.00        | 0.00 |
| expect to<br>(o/o)        | $D^*    D_{vt}$ | 0.13      | 0.01 | 0.56        | 0.00 |
|                           | $D^*    D$      | 0.08      | 0.00 | 0.00        | 0.00 |
| happen to<br>(o/o)        | $D^*    D_{vt}$ | 0.00      | 0.03 | 0.52        | 0.06 |
|                           | $D^*    D$      | 0.16      | 0.12 | 0.00        | 0.00 |
| claim to<br>(o/o)         | $D^*    D_{vt}$ | 0.02      | 0.03 | 0.54        | 0.04 |
|                           | $D^*    D$      | 0.15      | 0.12 | 0.00        | 0.00 |
| wish to<br>(o/o)          | $D^*    D_{vt}$ | 0.21      | 0.07 | 0.01        | 0.01 |
|                           | $D^*    D$      | 0.06      | 0.08 | 0.00        | 0.00 |
| wait to<br>(o/o)          | $D^*    D_{vt}$ | 0.55      | 5.45 | 0.39        | 1.32 |
|                           | $D^*    D$      | 0.02      | 1.05 | 0.00        | 0.02 |
| love to<br>(o/o)          | $D^*    D_{vt}$ | 0.02      | 0.01 | 0.62        | 0.18 |
|                           | $D^*    D$      | 0.12      | 0.25 | 0.00        | 0.00 |
| work to<br>(o/o)          | $D^*    D_{vt}$ | 0.02      | 0.35 | 0.53        | 0.03 |
|                           | $D^*    D$      | 0.13      | 0.14 | 0.00        | 0.00 |
| say to<br>(o/o)           | $D^*    D_{vt}$ | 0.02      | 0.00 | 0.52        | 0.05 |
|                           | $D^*    D$      | 0.15      | 0.03 | 0.00        | 0.00 |
| prefer to<br>(o/o)        | $D^*    D_{vt}$ | 0.11      | 0.04 | 0.51        | 0.15 |
|                           | $D^*    D$      | 0.06      | 0.04 | 0.00        | 0.00 |
| hope to<br>(o/o)          | $D^*    D_{vt}$ | 0.07      | 0.31 | 0.05        | 1.31 |
|                           | $D^*    D$      | 0.16      | 0.08 | 0.00        | 0.00 |
| prove to<br>(o/o)         | $D^*    D_{vt}$ | 0.00      | 0.01 | 0.77        | 0.04 |
|                           | $D^*    D$      | 0.16      | 0.12 | 0.01        | 0.01 |
| seem to<br>(o/o)          | $D^*    D_{vt}$ | 0.00      | 0.18 | 0.57        | 1.14 |
|                           | $D^*    D$      | 0.16      | 0.11 | 0.01        | 0.00 |
| try to<br>(o/o)           | $D^*    D_{vt}$ | 0.42      | 0.26 | 0.66        | 1.20 |
|                           | $D^*    D$      | 0.06      | 0.11 | 0.00        | 0.00 |
| continue to<br>(o/o)      | $D^*    D_{vt}$ | 0.00      | 0.00 | 0.58        | 0.12 |
|                           | $D^*    D$      | 0.16      | 0.08 | 0.00        | 0.00 |
| need to<br>(o/o)          | $D^*    D_{vt}$ | 0.24      | 0.27 | 0.24        | 0.94 |
|                           | $D^*    D$      | 0.06      | 0.07 | 0.00        | 0.01 |
| want to<br>(o/o)          | $D^*    D_{vt}$ | 0.18      | 0.47 | 0.03        | 0.97 |
|                           | $D^*    D$      | 0.04      | 0.04 | 0.00        | 0.00 |

|                     | $D^* \parallel D_{vt}$ | Main Verb |      | Compl. Verb |      |
|---------------------|------------------------|-----------|------|-------------|------|
|                     |                        | Pos.      | Neg. | Pos.        | Neg. |
| like to (o/o)       | $D^* \parallel D_{vt}$ | 0.08      | 0.01 | 0.59        | 0.01 |
|                     | $D^* \parallel D$      | 0.11      | 0.00 | 0.00        | 0.00 |
| appear to (o/o)     | $D^* \parallel D_{vt}$ | 0.00      | 0.17 | 0.58        | 0.95 |
|                     | $D^* \parallel D$      | 0.16      | 0.11 | 0.00        | 0.00 |
| plan to (o/o)       | $D^* \parallel D_{vt}$ | 0.04      | 0.01 | 0.56        | 0.07 |
|                     | $D^* \parallel D$      | 0.14      | 0.10 | 0.00        | 0.00 |
| choose to (o/o)     | $D^* \parallel D_{vt}$ | 0.00      | 0.20 | 0.63        | 0.81 |
|                     | $D^* \parallel D$      | 0.16      | 0.10 | 0.00        | 0.00 |
| decide to (o/o)     | $D^* \parallel D_{vt}$ | 0.00      | 0.20 | 0.74        | 0.81 |
|                     | $D^* \parallel D$      | 0.16      | 0.10 | 0.01        | 0.01 |
| prepare to (o/o)    | $D^* \parallel D_{vt}$ | 0.03      | 0.00 | 0.47        | 0.02 |
|                     | $D^* \parallel D$      | 0.14      | 0.02 | 0.00        | 0.00 |
| pretend to (o/o)    | $D^* \parallel D_{vt}$ | 1.02      | 0.04 | 0.55        | 0.01 |
|                     | $D^* \parallel D$      | 0.04      | 0.07 | 0.00        | 0.00 |
| proceed to (o/o)    | $D^* \parallel D_{vt}$ | 0.00      | 0.19 | 0.55        | 1.11 |
|                     | $D^* \parallel D$      | 0.16      | 0.11 | 0.00        | 0.00 |
| return to (o/o)     | $D^* \parallel D_{vt}$ | 0.00      | 0.10 | 0.59        | 0.03 |
|                     | $D^* \parallel D$      | 0.16      | 0.03 | 0.00        | 0.00 |
| cease to (o/o)      | $D^* \parallel D_{vt}$ | 0.33      | 0.19 | 0.17        | 4.72 |
|                     | $D^* \parallel D$      | 1.07      | 1.19 | 0.01        | 0.00 |
| propose to (o/o)    | $D^* \parallel D_{vt}$ | 0.11      | 0.17 | 0.50        | 0.88 |
|                     | $D^* \parallel D$      | 0.14      | 0.11 | 0.00        | 0.00 |
| deserve to (o/o)    | $D^* \parallel D_{vt}$ | 0.15      | 0.00 | 0.55        | 0.09 |
|                     | $D^* \parallel D$      | 0.07      | 0.13 | 0.00        | 0.00 |
| exist to (o/o)      | $D^* \parallel D_{vt}$ | 0.01      | 0.46 | 0.57        | 1.03 |
|                     | $D^* \parallel D$      | 0.13      | 0.03 | 0.00        | 0.00 |
| aim to (o/o)        | $D^* \parallel D_{vt}$ | 0.03      | 0.23 | 0.54        | 1.05 |
|                     | $D^* \parallel D$      | 0.14      | 0.09 | 0.00        | 0.00 |
| strive to (o/o)     | $D^* \parallel D_{vt}$ | 0.09      | 0.01 | 0.48        | 0.06 |
|                     | $D^* \parallel D$      | 0.11      | 0.09 | 0.01        | 0.00 |
| threaten to (o/o)   | $D^* \parallel D_{vt}$ | 0.05      | 0.41 | 0.10        | 1.07 |
|                     | $D^* \parallel D$      | 0.18      | 0.04 | 0.00        | 0.00 |
| promise to (o/o)    | $D^* \parallel D_{vt}$ | 0.03      | 0.00 | 0.54        | 0.10 |
|                     | $D^* \parallel D$      | 0.15      | 0.04 | 0.00        | 0.00 |
| ask to (o/o)        | $D^* \parallel D_{vt}$ | 0.43      | 0.02 | 0.42        | 0.04 |
|                     | $D^* \parallel D$      | 0.22      | 0.02 | 0.00        | 0.01 |
| turn to (o/o)       | $D^* \parallel D_{vt}$ | 0.00      | 0.04 | 0.57        | 0.00 |
|                     | $D^* \parallel D$      | 0.16      | 0.03 | 0.00        | 0.00 |
| struggle to (o/o)   | $D^* \parallel D_{vt}$ | 2.04      | 0.10 | 5.62        | 0.60 |
|                     | $D^* \parallel D$      | 0.55      | 0.35 | 0.01        | 0.01 |
| reply that (o/o)    | $D^* \parallel D_{vt}$ | 0.02      | 0.04 | 0.09        | 1.46 |
|                     | $D^* \parallel D$      | 0.03      | 0.37 | 0.00        | 0.04 |
| hope that (o/o)     | $D^* \parallel D_{vt}$ | 0.01      | 0.15 | 0.36        | 0.42 |
|                     | $D^* \parallel D$      | 0.39      | 0.05 | 0.02        | 0.06 |
| decide that (o/o)   | $D^* \parallel D_{vt}$ | 0.04      | 0.02 | 0.08        | 0.41 |
|                     | $D^* \parallel D$      | 0.02      | 0.08 | 0.01        | 0.06 |
| imply that (o/o)    | $D^* \parallel D_{vt}$ | 0.01      | 0.01 | 0.05        | 0.42 |
|                     | $D^* \parallel D$      | 0.06      | 0.13 | 0.01        | 0.06 |
| declare that (o/o)  | $D^* \parallel D_{vt}$ | 0.02      | 1.10 | 0.08        | 2.97 |
|                     | $D^* \parallel D$      | 0.02      | 0.12 | 0.00        | 0.09 |
| prove that (o/o)    | $D^* \parallel D_{vt}$ | 0.06      | 0.02 | 0.03        | 0.27 |
|                     | $D^* \parallel D$      | 0.02      | 0.05 | 0.00        | 0.02 |
| assert that (o/o)   | $D^* \parallel D_{vt}$ | 0.05      | 0.04 | 0.09        | 0.45 |
|                     | $D^* \parallel D$      | 0.01      | 0.10 | 0.00        | 0.07 |
| feel that (o/o)     | $D^* \parallel D_{vt}$ | 0.05      | 0.06 | 0.06        | 0.85 |
|                     | $D^* \parallel D$      | 0.01      | 0.38 | 0.01        | 0.03 |
| expect that (o/o)   | $D^* \parallel D_{vt}$ | 0.30      | 0.11 | 0.10        | 0.15 |
|                     | $D^* \parallel D$      | 0.01      | 0.03 | 0.00        | 0.04 |
| insist that (o/o)   | $D^* \parallel D_{vt}$ | 0.09      | 0.37 | 0.11        | 0.22 |
|                     | $D^* \parallel D$      | 0.02      | 0.06 | 0.01        | 0.09 |
| announce that (o/o) | $D^* \parallel D_{vt}$ | 0.03      | 0.03 | 0.08        | 0.24 |
|                     | $D^* \parallel D$      | 0.02      | 0.05 | 0.01        | 0.08 |
| worry that (o/o)    | $D^* \parallel D_{vt}$ | 0.03      | 0.34 | 0.12        | 0.18 |
|                     | $D^* \parallel D$      | 0.19      | 0.41 | 0.01        | 0.05 |

|                      | $D^* \parallel D_{vt}$ | Main Verb |      | Compl. Verb |      |
|----------------------|------------------------|-----------|------|-------------|------|
|                      |                        | Pos.      | Neg. | Pos.        | Neg. |
| hold that (o/o)      | $D^* \parallel D_{vt}$ | 0.08      | 0.00 | 0.06        | 0.11 |
|                      | $D^* \parallel D$      | 0.01      | 0.05 | 0.00        | 0.05 |
| complain that (o/o)  | $D^* \parallel D_{vt}$ | 0.02      | 0.02 | 0.05        | 0.16 |
|                      | $D^* \parallel D$      | 0.00      | 0.38 | 0.01        | 0.06 |
| propose that (o/o)   | $D^* \parallel D_{vt}$ | 0.37      | 0.94 | 0.07        | 3.25 |
|                      | $D^* \parallel D$      | 0.03      | 0.21 | 0.00        | 0.06 |
| request that (o/o)   | $D^* \parallel D_{vt}$ | 0.69      | 2.15 | 0.04        | 0.91 |
|                      | $D^* \parallel D$      | 0.13      | 0.03 | 0.01        | 0.07 |
| speculate that (o/o) | $D^* \parallel D_{vt}$ | 0.34      | 0.46 | 0.04        | 1.21 |
|                      | $D^* \parallel D$      | 0.48      | 0.13 | 0.01        | 0.09 |
| recommend that (o/o) | $D^* \parallel D_{vt}$ | 0.21      | 1.16 | 0.04        | 0.79 |
|                      | $D^* \parallel D$      | 0.02      | 0.04 | 0.01        | 0.05 |
| seem that (o/o)      | $D^* \parallel D_{vt}$ | 0.08      | 1.95 | 0.08        | 4.69 |
|                      | $D^* \parallel D$      | 0.00      | 0.27 | 0.00        | 0.04 |
| demand that (o/o)    | $D^* \parallel D_{vt}$ | 0.39      | 1.81 | 0.03        | 0.75 |
|                      | $D^* \parallel D$      | 0.05      | 0.02 | 0.01        | 0.06 |
| saw that (o/o)       | $D^* \parallel D_{vt}$ | 0.02      | 1.09 | 0.11        | 1.53 |
|                      | $D^* \parallel D$      | 0.02      | 0.00 | 0.00        | 0.05 |
| state that (o/o)     | $D^* \parallel D_{vt}$ | 0.05      | 0.94 | 0.05        | 3.75 |
|                      | $D^* \parallel D$      | 0.02      | 0.17 | 0.01        | 0.10 |
| argue that (o/o)     | $D^* \parallel D_{vt}$ | 0.17      | 0.28 | 0.06        | 1.39 |
|                      | $D^* \parallel D$      | 0.01      | 0.11 | 0.01        | 0.09 |
| indicate that (o/o)  | $D^* \parallel D_{vt}$ | 0.05      | 0.47 | 0.05        | 3.09 |
|                      | $D^* \parallel D$      | 0.01      | 0.33 | 0.01        | 0.08 |
| report that (o/o)    | $D^* \parallel D_{vt}$ | 0.03      | 2.09 | 0.07        | 3.22 |
|                      | $D^* \parallel D$      | 0.02      | 0.04 | 0.01        | 0.06 |
| suggest that (o/o)   | $D^* \parallel D_{vt}$ | 0.04      | 0.49 | 0.04        | 3.41 |
|                      | $D^* \parallel D$      | 0.07      | 0.45 | 0.01        | 0.07 |
| think that (o/o)     | $D^* \parallel D_{vt}$ | 0.28      | 0.56 | 0.07        | 3.43 |
|                      | $D^* \parallel D$      | 0.01      | 0.48 | 0.01        | 0.05 |
| believe that (o/o)   | $D^* \parallel D_{vt}$ | 0.00      | 0.30 | 0.05        | 0.68 |
|                      | $D^* \parallel D$      | 0.01      | 0.06 | 0.00        | 0.03 |
| be that (o/o)        | $D^* \parallel D_{vt}$ | 0.01      | 3.84 | 0.12        | 3.82 |
|                      | $D^* \parallel D$      | 0.03      | 0.03 | 0.00        | 0.00 |
| say that (o/o)       | $D^* \parallel D_{vt}$ | 0.06      | 0.03 | 0.07        | 0.87 |
|                      | $D^* \parallel D$      | 0.01      | 0.30 | 0.01        | 0.10 |
| agree that (o/o)     | $D^* \parallel D_{vt}$ | 0.05      | 0.38 | 0.04        | 1.50 |
|                      | $D^* \parallel D$      | 0.02      | 0.10 | 0.00        | 0.05 |
| felt that (o/o)      | $D^* \parallel D_{vt}$ | 0.07      | 0.68 | 0.09        | 3.38 |
|                      | $D^* \parallel D$      | 0.01      | 0.38 | 0.01        | 0.03 |
| conclude that (o/o)  | $D^* \parallel D_{vt}$ | 0.04      | 0.03 | 0.11        | 0.29 |
|                      | $D^* \parallel D$      | 0.02      | 0.06 | 0.00        | 0.04 |
| claim that (o/o)     | $D^* \parallel D_{vt}$ | 0.17      | 0.04 | 0.07        | 0.72 |
|                      | $D^* \parallel D$      | 0.00      | 0.18 | 0.01        | 0.07 |
| mean that (o/o)      | $D^* \parallel D_{vt}$ | 0.03      | 0.09 | 0.06        | 0.00 |
|                      | $D^* \parallel D$      | 0.02      | 0.04 | 0.01        | 0.05 |
| assume that (o/o)    | $D^* \parallel D_{vt}$ | 0.05      | 0.06 | 0.05        | 0.07 |
|                      | $D^* \parallel D$      | 0.13      | 0.05 | 0.01        | 0.08 |
| require that (o/o)   | $D^* \parallel D_{vt}$ | 0.18      | 0.91 | 0.04        | 0.83 |
|                      | $D^* \parallel D$      | 0.01      | 0.03 | 0.01        | 0.01 |
| estimate that (o/o)  | $D^* \parallel D_{vt}$ | 0.10      | 0.04 | 0.07        | 0.48 |
|                      | $D^* \parallel D$      | 0.01      | 0.07 | 0.01        | 0.09 |
| comment that (o/o)   | $D^* \parallel D_{vt}$ | 0.03      | 0.07 | 0.07        | 1.36 |
|                      | $D^* \parallel D$      | 0.02      | 0.24 | 0.01        | 0.07 |
| advise that (o/o)    | $D^* \parallel D_{vt}$ | 0.13      | 0.14 | 0.07        | 0.11 |
|                      | $D^* \parallel D$      | 0.00      | 0.05 | 0.00        | 0.07 |
| doubt that (o/o)     | $D^* \parallel D_{vt}$ | 0.02      | 0.01 | 1.07        | 1.68 |
|                      | $D^* \parallel D$      | 1.36      | 0.69 | 0.01        | 0.08 |
| give that (o/o)      | $D^* \parallel D_{vt}$ | 0.01      | 1.27 | 0.07        | 1.77 |
|                      | $D^* \parallel D$      | 0.03      | 0.09 | 0.01        | 0.05 |
| concern that (o/o)   | $D^* \parallel D_{vt}$ | 0.59      | 0.05 | 0.06        | 0.02 |
|                      | $D^* \parallel D$      | 0.07      | 0.17 | 0.01        | 0.06 |
| convince that (o/o)  | $D^* \parallel D_{vt}$ | 0.12      | 0.10 | 0.17        | 0.45 |
|                      | $D^* \parallel D$      | 0.00      | 0.12 | 0.00        | 0.03 |

|                       |                        | Main Verb |      | Compl. Verb |      |
|-----------------------|------------------------|-----------|------|-------------|------|
|                       |                        | Pos.      | Neg. | Pos.        | Neg. |
| fear that<br>(o/o)    | $D^* \parallel D_{vt}$ | 0.12      | 0.31 | 0.79        | 1.21 |
|                       | $D^* \parallel D$      | 0.41      | 0.28 | 0.01        | 0.06 |
| write that<br>(o/o)   | $D^* \parallel D_{vt}$ | 0.07      | 0.31 | 0.03        | 1.41 |
|                       | $D^* \parallel D$      | 0.03      | 0.12 | 0.00        | 0.07 |
| tell that<br>(o/o)    | $D^* \parallel D_{vt}$ | 0.02      | 0.18 | 0.09        | 1.47 |
|                       | $D^* \parallel D$      | 0.03      | 0.14 | 0.01        | 0.07 |
| hear that<br>(o/o)    | $D^* \parallel D_{vt}$ | 0.02      | 0.93 | 0.11        | 2.03 |
|                       | $D^* \parallel D$      | 0.02      | 0.24 | 0.01        | 0.05 |
| contend that<br>(o/o) | $D^* \parallel D_{vt}$ | 0.15      | 0.25 | 0.07        | 0.56 |
|                       | $D^* \parallel D$      | 0.00      | 0.10 | 0.01        | 0.10 |
| appear that<br>(o/o)  | $D^* \parallel D_{vt}$ | 0.05      | 1.16 | 0.09        | 1.37 |
|                       | $D^* \parallel D$      | 0.01      | 0.28 | 0.00        | 0.01 |
| provide that<br>(o/o) | $D^* \parallel D_{vt}$ | 0.08      | 1.69 | 0.07        | 0.81 |
|                       | $D^* \parallel D$      | 0.01      | 0.01 | 0.01        | 0.04 |
| wish that<br>(o/o)    | $D^* \parallel D_{vt}$ | 0.22      | 0.14 | 1.21        | 0.22 |
|                       | $D^* \parallel D$      | 0.91      | 0.01 | 0.00        | 0.03 |
| mention that<br>(o/o) | $D^* \parallel D_{vt}$ | 0.06      | 0.14 | 0.06        | 1.64 |
|                       | $D^* \parallel D$      | 0.01      | 0.18 | 0.01        | 0.10 |

Table 5: Comparison (KL divergence) of post-manipulation prediction distribution to target verb distribution ( $D_{vt}$ , top row) and baseline distribution ( $D$ , bottom row). High similarity to  $D_{vt}$  suggests the model changed its predictions in response to the manipulation.
